# Supplementary material for: [Retracted] CDC20 May Serve as a Potential Biomarker‐Based Risk Score System in Predicting the Prognosis of Patients with Hepatocellular Carcinoma
Source: Hindawi journal article supplement (doi:10.1155/2022/8421813), 2022-01-01
Supplement: f1 [file 8421813.f1.docx]

Supplementary Material

Supplementary Figures

**
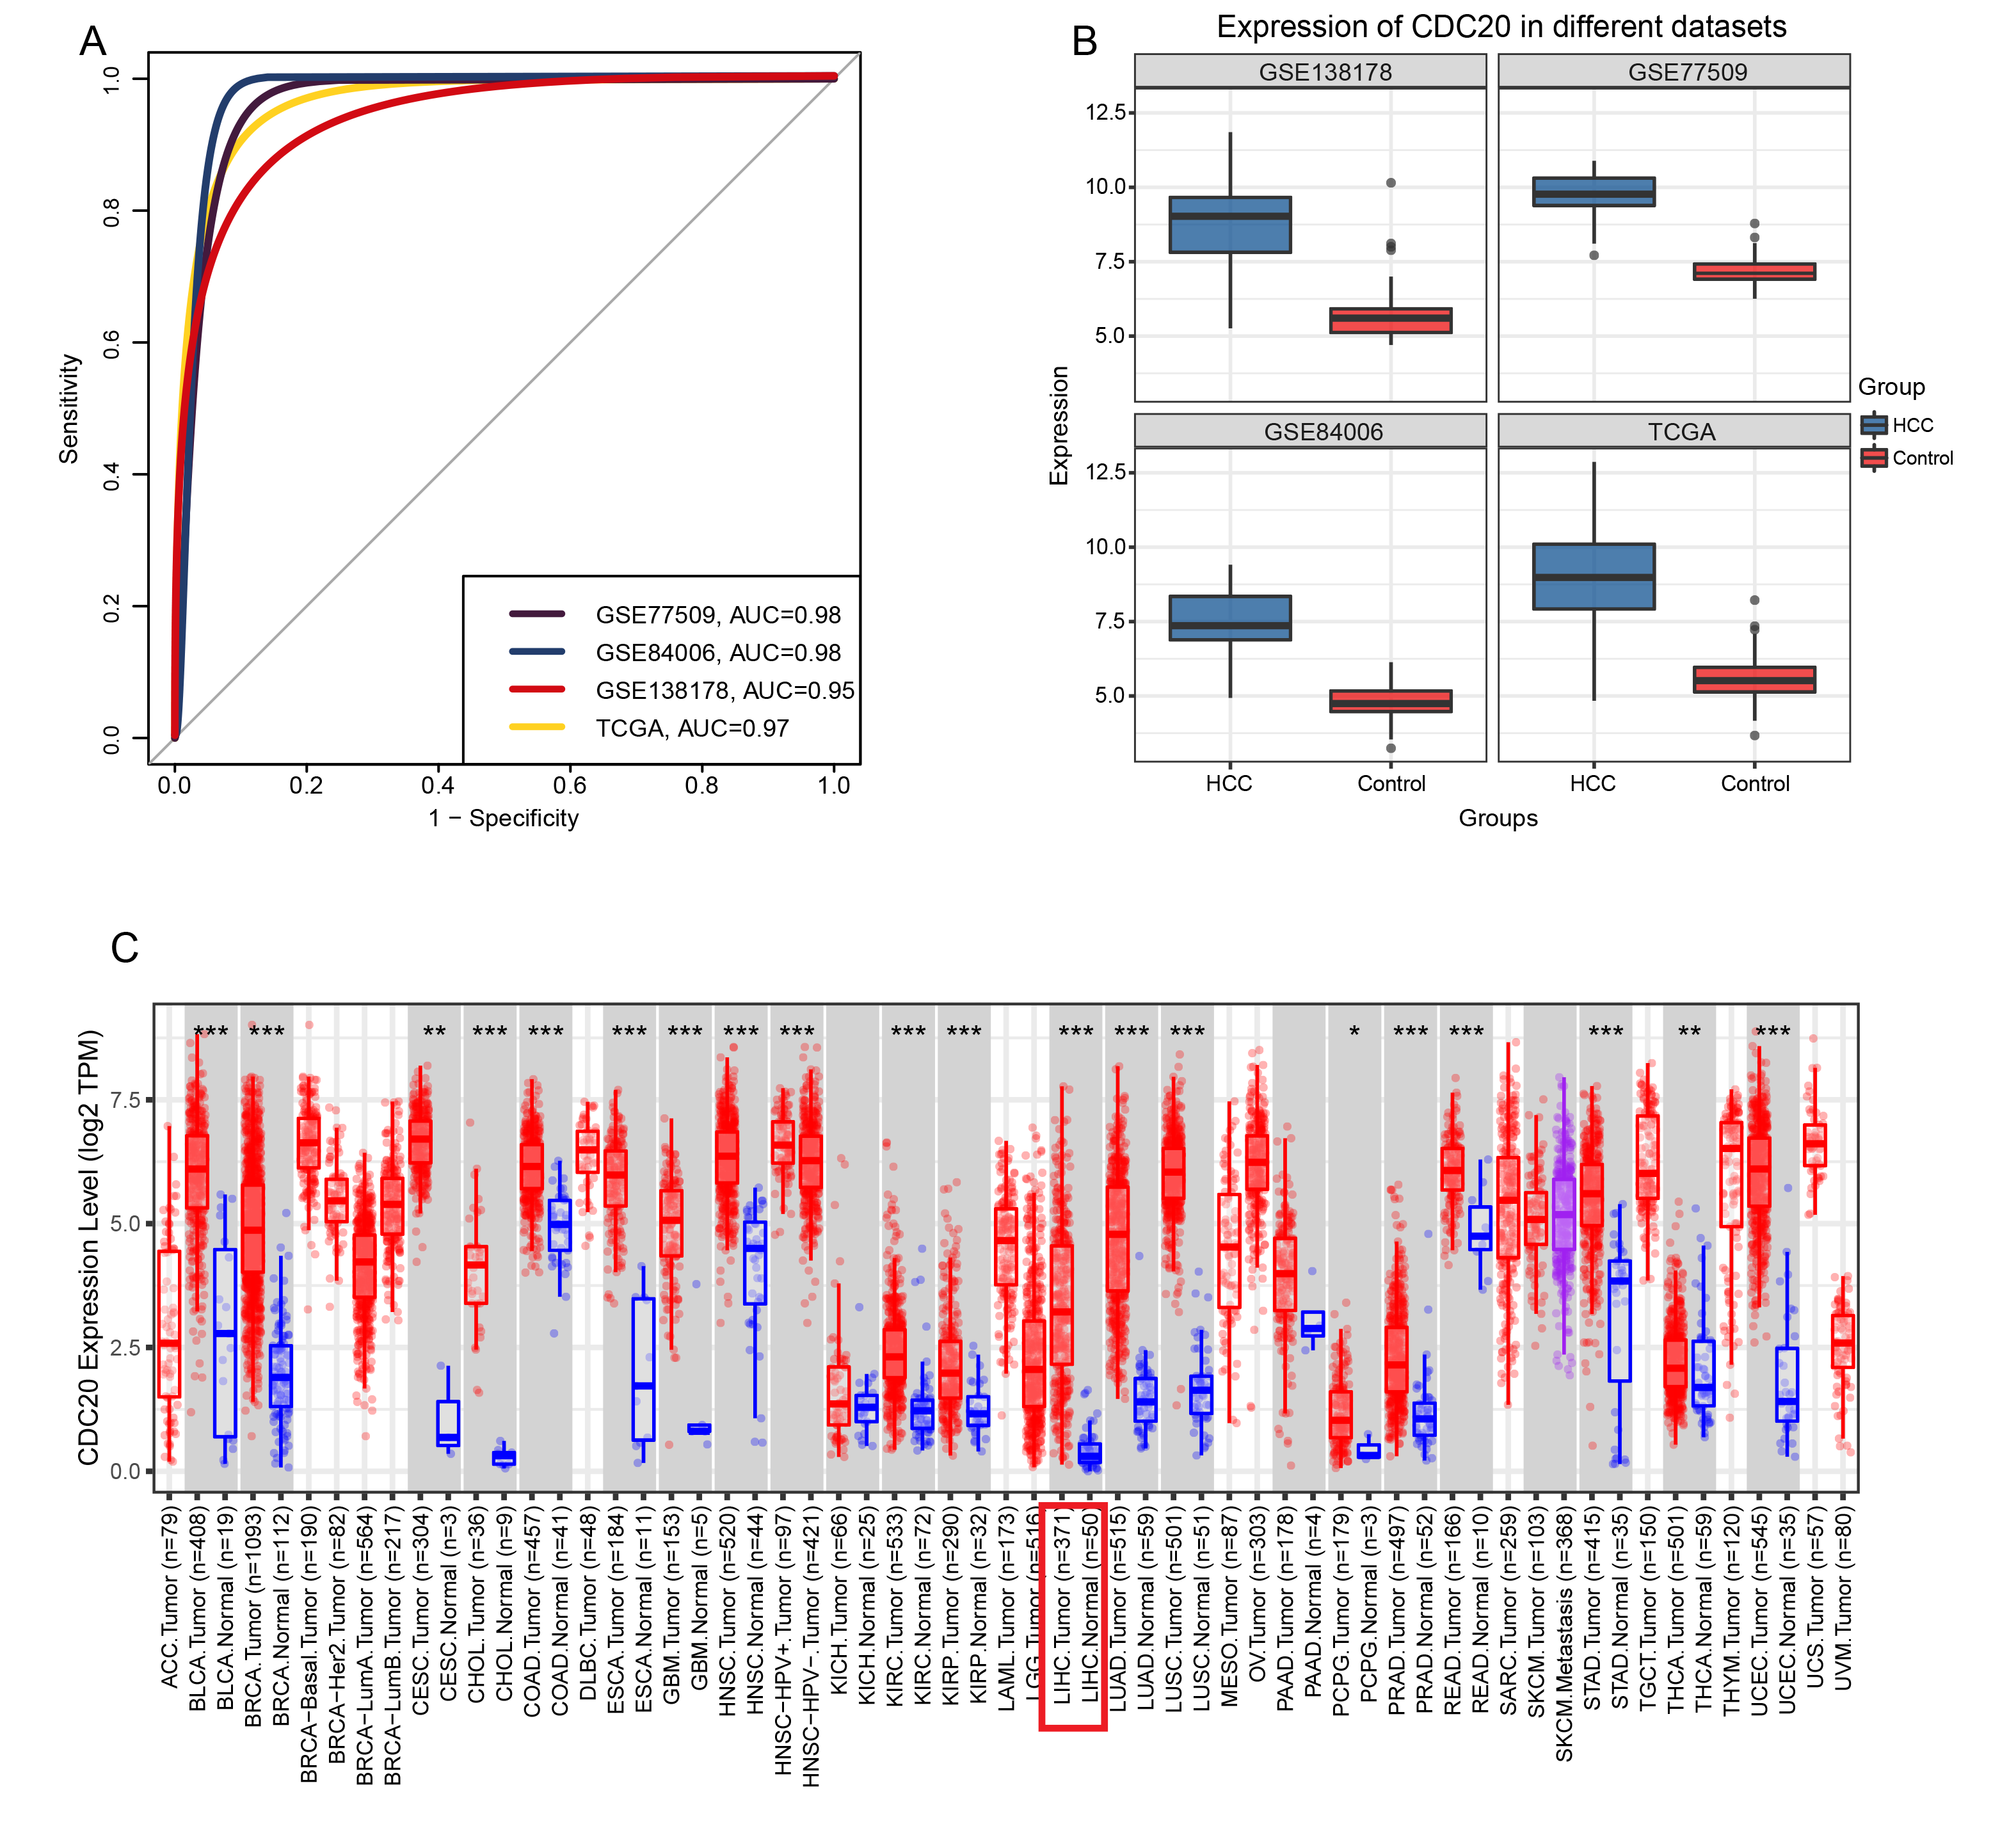
**

**Figure S1 The expression of CDC20 in HCC.** (A) AUC value of CDC20 in all four datasets (TCGA, GSE138178, GSE84006 and GSE77509). (B) The expressed level of CDC20 between HCC and controls in all four datasets. (C) CDC20 expression levels in tumor and adjacent normal tissues based on RNA sequencing data from The Cancer Genome Atlas in the Tumor Immune Estimation Resource database. *P* < 0.1, **P* < 0.05, ***P* < 0.01, ****P* < 0.001.
